# Supplementary material for: Gut Microbiome Disruption Following SARS-CoV-2: A Review
Source: MDPI journal article supplement (doi:10.3390/microorganisms12010131), 2024-01-09
Supplement: s1 [file s1]

## Supplementary Materials

**Table S1.** List of bacteria with pro-inflammatory, not clear pro-inflammatory or anti-inflammatory, and anti-inflammatory profiles. The missing taxa are a result of the lack of sufficient evidence in the Pubmed search.

| Pro-Inflammatory                                                                                                                                                   | Not Clearly Pro-Inflammatory or Anti-Inflammatory                                                                                                                                          | Anti-Inflammatory                                                                              |
|--------------------------------------------------------------------------------------------------------------------------------------------------------------------|--------------------------------------------------------------------------------------------------------------------------------------------------------------------------------------------|------------------------------------------------------------------------------------------------|
| Parabacteroides<br>Alistipes<br>Bacteroides<br>Desulfovibrio<br>Streptococcus<br>Balutia<br>Dorea<br>Parabacteroides<br>Bacteroides<br>Pseudomonas<br>Ruminococcus | Agathobacter<br>Barnesiella<br>Coproacter<br>Holdemanella<br>Paraprevotella<br>Phocaecola<br>Subdoligranulum<br>Turicibacter<br>Lachnoclostridium<br>Maihella<br>Haemophilus<br>Prevotella | Roseburia<br>Faecalibacterium<br>Bifidobacterium<br>Akkermansia<br>Lachnospira<br>Oscillospira |

**Table S2.** List of main categories of diseases included.

| Category Used for the AI/PI Score       | MESH Terms Reported in PubMed or Abstract of the Publication                                                                                                                                                                                                                                                |
|-----------------------------------------|-------------------------------------------------------------------------------------------------------------------------------------------------------------------------------------------------------------------------------------------------------------------------------------------------------------|
| IBD or Inflammation in the gut          | Inflammatory Bowel Diseases<br>Irritable Bowel Syndrome<br>Pain with Irritable Bowel Syndrome<br>Crohn Disease<br>Crohn Disease with ASCA<br>Crohn Disease with injury<br>Inflammation<br>Intestinal Diseases<br>Gastroenteritis<br>Gastrointestinal Diseases<br>Colitis<br>Colitis, Ulcerative<br>Diarrhea |
| Cardiovascular Diseases or hypertension | Atherosclerosis<br>Cardiovascular Diseases<br>Chronic heart failure                                                                                                                                                                                                                                         |

|                                                  |                                                                                                                                                                                                   |
|--------------------------------------------------|---------------------------------------------------------------------------------------------------------------------------------------------------------------------------------------------------|
|                                                  | Hypertension<br>Blood pressure                                                                                                                                                                    |
| Autoimmune Diseases                              | Autoimmune Diseases,<br>Multiple Sclerosis,<br>Systemic sclerosis (SSc)<br>Amyotrophic lateral sclerosis                                                                                          |
| Metabolic Diseases                               | Metabolic Diseases<br>Metabolic Syndrome                                                                                                                                                          |
| Renal diseases                                   | Renal disease<br>End stage renal disease<br>Diabetic nephropathy<br>Renal Insufficiency, Chronic                                                                                                  |
| Liver Diseases                                   | Liver Diseases<br>Liver Cirrhosis<br>Non-alcoholic Fatty Liver Disease<br>Cystic Fibrosis with Liver Cirrhosis                                                                                    |
| Diabetes or insulin resistance                   | Diabetes,<br>Insulin resistance<br>Diabetes Mellitus<br>Diabetes Mellitus, Type 1 and Type2<br>Gestational diabetes mellitus<br>Obesity with diabetes                                             |
| Cancer, gastrointestinal tract                   | Colonic Neoplasms<br>Colonic Polyps<br>Colorectal Neoplasms<br>Colorectal cancer<br>Stomach Neoplasms<br>Neoplasm'                                                                                |
| Depression or Bipolar or Schizophrenia or Stress | Depressive Disorder<br>Depressive Disorder, Major,<br>Bipolar Disorder<br>Schizophrenia<br>Anxiety<br>Depression<br>Stress, Physiological<br>Stress, Psychological<br>Mental Disorders<br>Anxiety |
